# Supplementary material for: Robust Phagocyte Recruitment Controls the Opportunistic Fungal Pathogen Mucor circinelloides in Innate Granulomas In Vivo
Source: PubMed Central journal article supplement (PMC5874920; doi:10.1128/mbio.02010-17), 2018-03-27

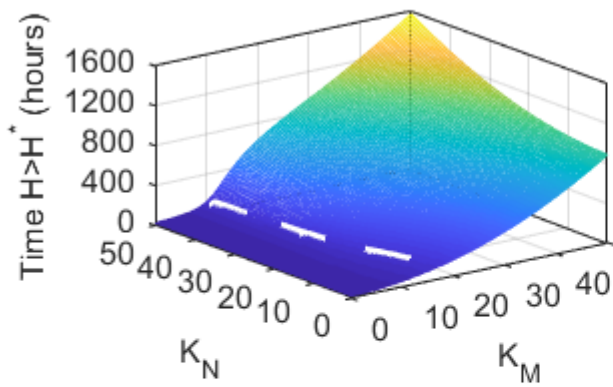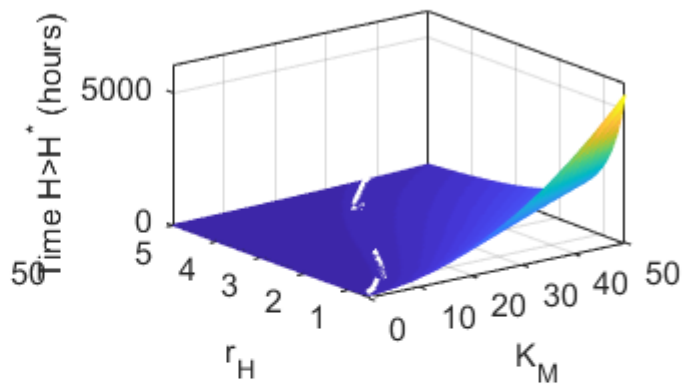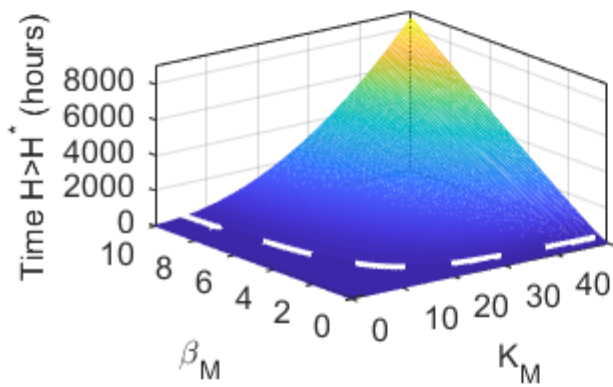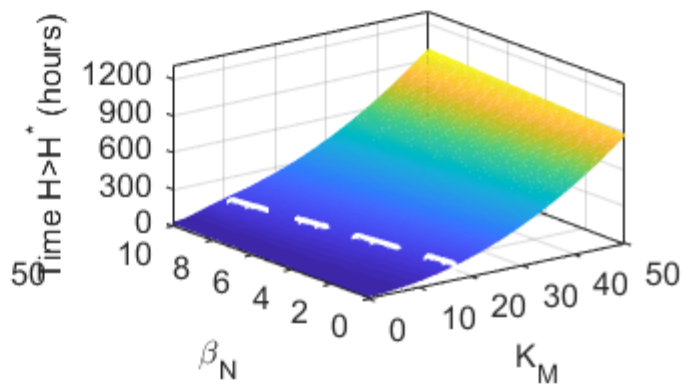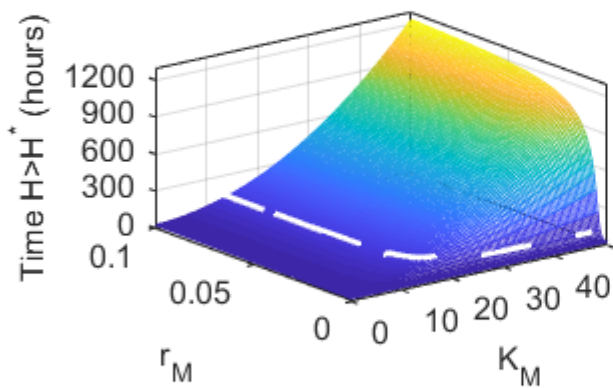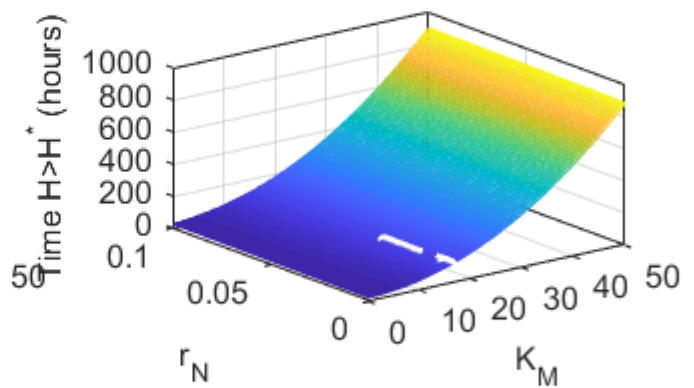

Supplement: mbo002183792sf2.pdf [file mbo002183792sf2.pdf]
